# Supplementary material for: Oxalyl dihydrazide polymorphism: a periodic dispersion-corrected DFT and MP2 investigation
Source: Royal Society of Chemistry journal article supplement (doi:10.1039/c3ce41758a), 2013-10-18
Supplement: c3ce41758a.pdf [file c3ce41758a.pdf]

# Oxalyl Dihydrazide Polymorphism: a Periodic Dispersion-Corrected DFT and MP2 Investigation.

## **- Electronic Supporting Information -**

Davide Presti, Alfonso Pedone, Maria Cristina Menziani,  
Bartolomeo Civalleri, Lorenzo Maschio

## A) $k$ -points and Energy Cutoff Screening

| PBE-TS (NCPP) - cutoff: 750 eV |                                   |                    |
|--------------------------------|-----------------------------------|--------------------|
| $k$ -pt. mesh                  | $k$ -pt. dist. ( $1/\text{\AA}$ ) | Energy (eV/atom)   |
| 1x1x1 ( $\Gamma$ )             | -                                 | -167.140499        |
| 3x1x1                          | 0.10                              | -167.310192        |
| 3x2x1                          | 0.08                              | -167.311698        |
| 5x2x2                          | 0.06                              | -167.312090        |
| <b>7x4x3</b>                   | <b>0.04</b>                       | <b>-167.312105</b> |

**Table 1** Single-point energy of crystalline oxalyl dihydrazide ( $\alpha$  phase) as a function of increasing  $k$ -points mesh size. Results are reported in eV per atom.

| PBE-TS - $k$ -points mesh size: 7x4x3 |                    |                    |                       |
|---------------------------------------|--------------------|--------------------|-----------------------|
|                                       | Energy cutoff (eV) | Energy (eV/atom)   | $\Delta E$ (meV/atom) |
| NCPP                                  | 750                | -167.312105        | -                     |
|                                       | <b>800</b>         | <b>-167.313536</b> | <b>-1.431</b>         |
|                                       | 850                | -167.314699        | -1.163                |
|                                       | 900                | -167.315604        | -0.905                |

**Table 2** Single-point energy (eV) of crystalline oxalyl dihydrazide ( $\alpha$  phase) as a function of increasing kinetic energy cutoff. Results for  $\Delta E$  are reported in meV per atom for convenience.

## B) Relative Stability at the Experimental Geometry

| Experimental Relative Stability - $\Delta E$ |                        |                       |
|----------------------------------------------|------------------------|-----------------------|
| <i>Phase</i>                                 | <b>PBE-TS</b> (kJ/mol) | <b>PBE-D</b> (kJ/mol) |
| $\alpha$                                     | -                      | -                     |
| $\beta$                                      | 11.371                 | 4.718                 |
| $\gamma$                                     | -26.884                | -28.821               |
| $\delta$                                     | 2.330                  | 0.848                 |
| $\epsilon$                                   | 66.761                 | 64.121                |

**Table 3** PBE-TS and PBE-D experimental relative stability (per molecule) of crystalline oxalyl dihydrazide. The  $\alpha$ -polymorph is taken as reference.
